# Supplementary material
Source: PubMed Central journal article supplement (PMC6133702)

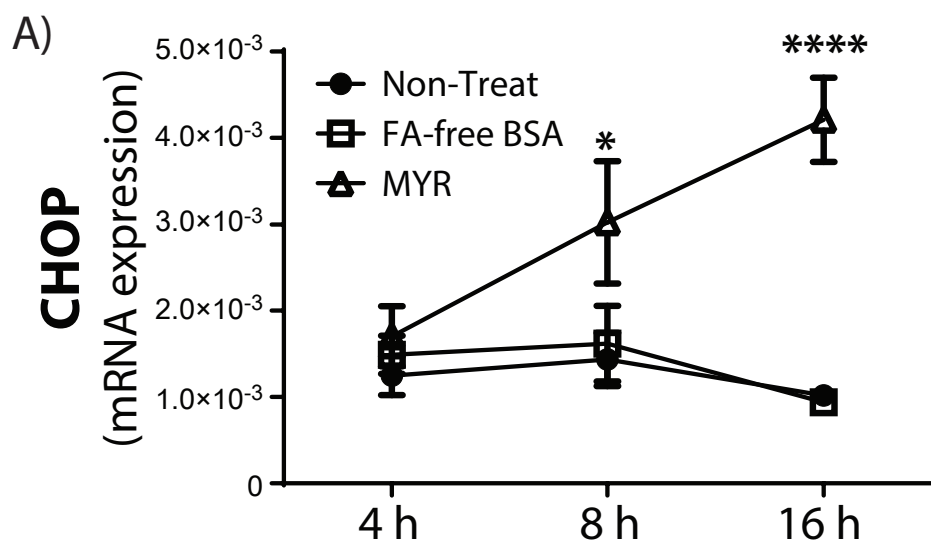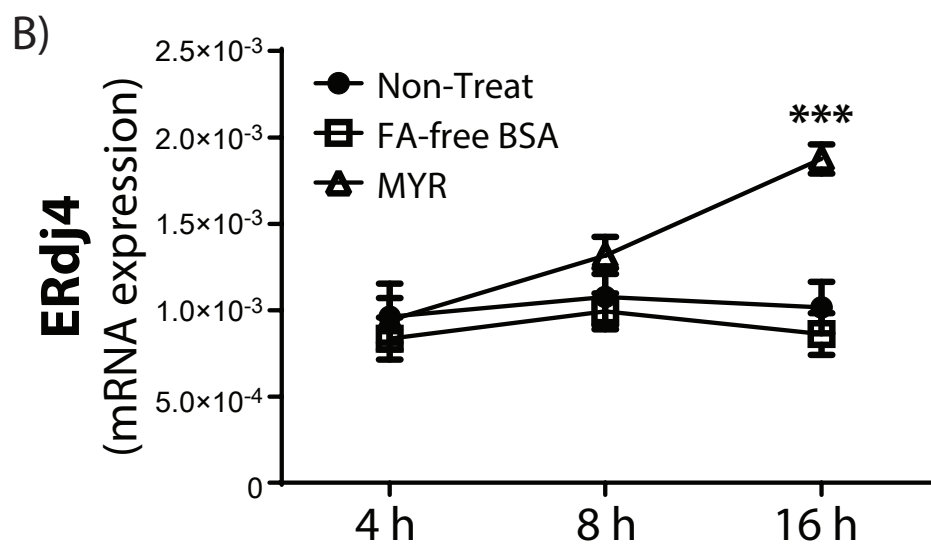

Figure S1

Supplement: fj.201800141R.sf1.pdf [file fj.201800141R.sf1.pdf]

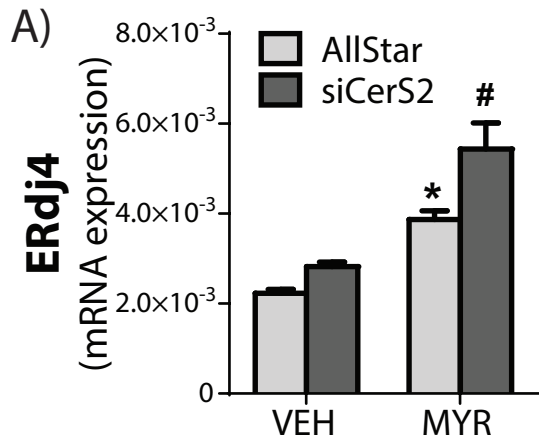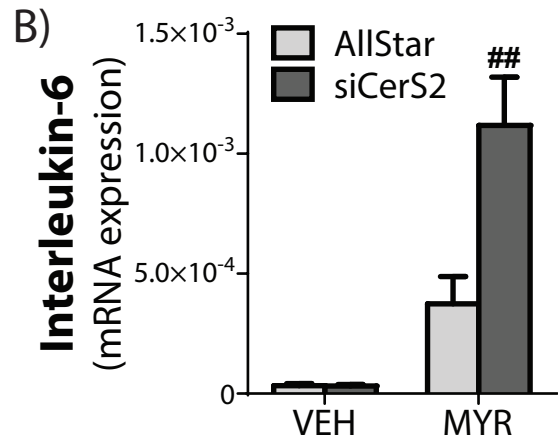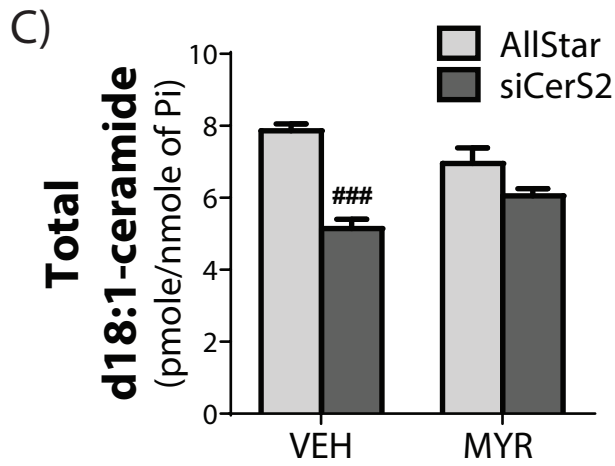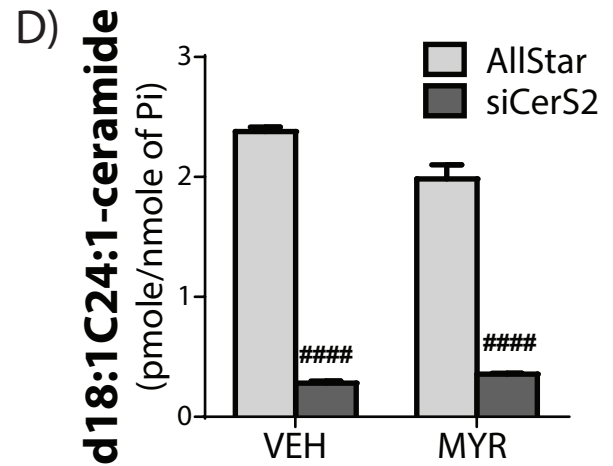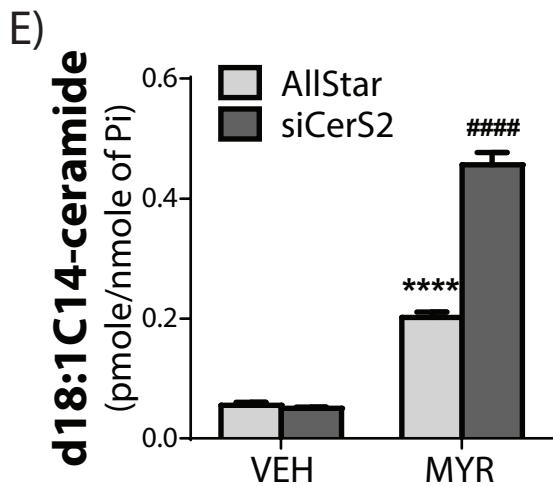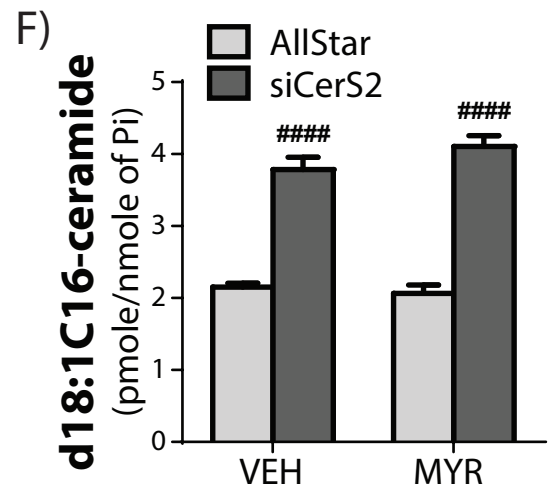

**Figure S2**

Supplement: fj.201800141R.sf2.pdf [file fj.201800141R.sf2.pdf]
